# Supplementary material for: Morphology effects on singlet oxygen production and bacterial photoinactivation efficiency by different silica-protoporphyrin IX nanocomposites
Source: Royal Society of Chemistry journal article supplement (doi:10.1039/c7ra00784a), 2017-01-01
Supplement: c7ra00784a1.pdf [file c7ra00784a1.pdf]

## Morphology effects on singlet oxygen production and bacterial photoinactivation efficiency by different silica-Protoporphyrin IX nanocomposites

G. Zampini,<sup>a,b</sup> O. Planas,<sup>b</sup> F. Marmottini,<sup>a</sup> O. Gulías,<sup>b</sup> M. Agut,<sup>b</sup> S. Nonell<sup>b,\*</sup> and L. L. Latterini<sup>a,\*</sup>

<sup>a</sup> Department of Chemistry, Biology and Biotechnology, via Elce di Sotto 8, 06123 Perugia, Italy.

<sup>b</sup> Institut Químic de Sarrià, Universitat Ramon Llull, Via Augusta 390, Barcelona 08017, Spain.

### Supporting equation

$$\text{mol}_{(\text{PpIX})}/\text{mg}_{(\text{Si})} = \frac{\left(\frac{\text{Abs}_0 - \text{Abs}_t}{\epsilon_{405}}\right) \times V}{\text{mg}_{\text{Si}}}$$

(Eq. S1)

**Abs<sub>0</sub>**: absorption values at 405 nm of PpIX starting solution.

**Abs<sub>t</sub>**: absorption values at 405 nm of the supernatant collected after the anchoring procedure.

**ε<sub>405</sub>**: PpIX extinction coefficient in DMF at 405 nm.

**V**: volume.

**mg<sub>Si</sub>**: silica weight in milligram added to PpIX solution.

## Supporting figures

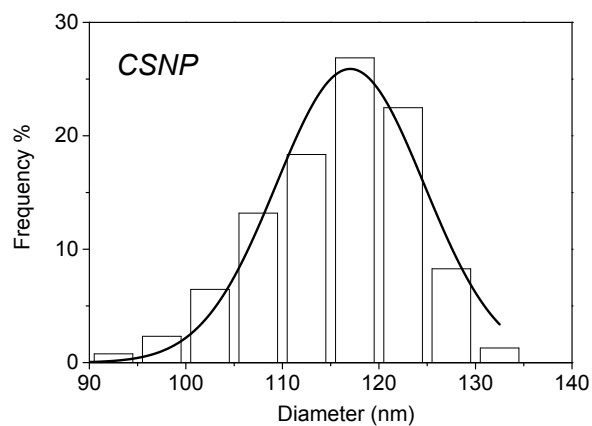

**Figure S1.** TEM size distribution for CSNP, counting approximately 300 nanoparticles; average diameter 117 nm ( $\sigma = 7.1$ ).

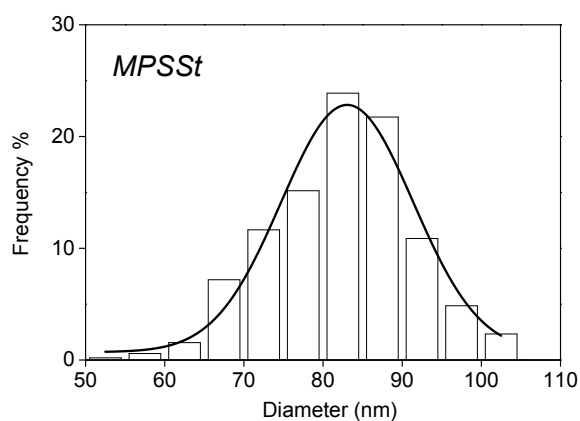

**Figure S2.** TEM size distribution for MPSSt, counting approximately 300 nanoparticles; average diameter 83 nm ( $\sigma = 8.8$ ).

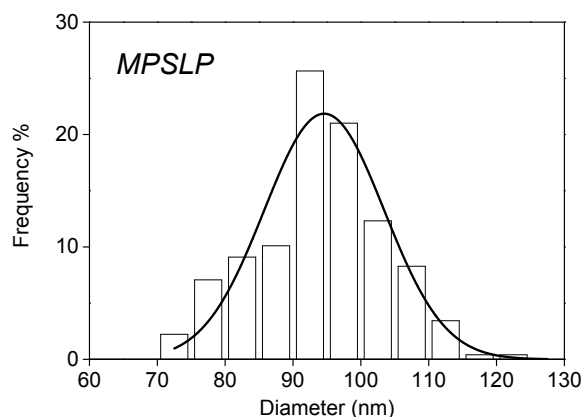

**Figure S3.** TEM size distribution for MPSLP, counting approximately 300 nanoparticles; average diameter 94 nm ( $\sigma = 8.8$ ).

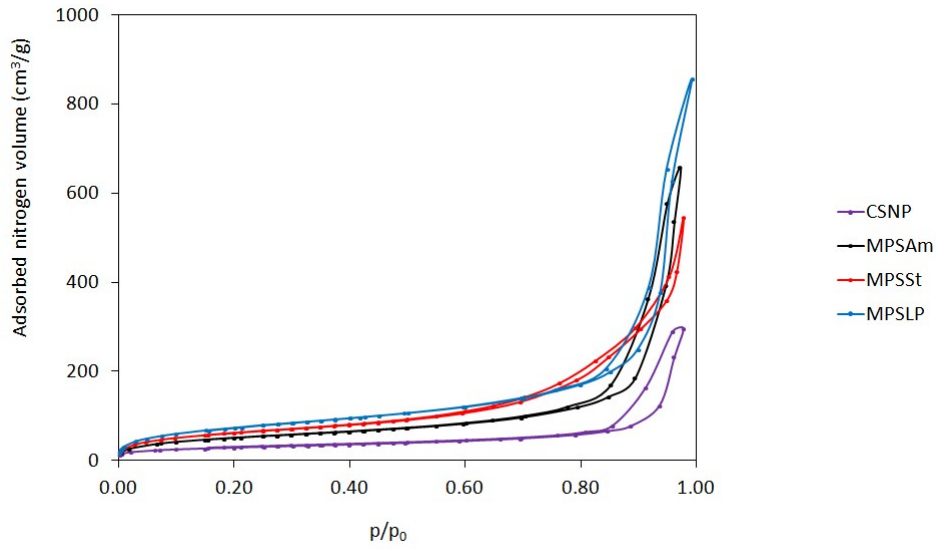

**Figure S4.** Nitrogen adsorption and desorption isotherms, at 77K, of the indicated samples.

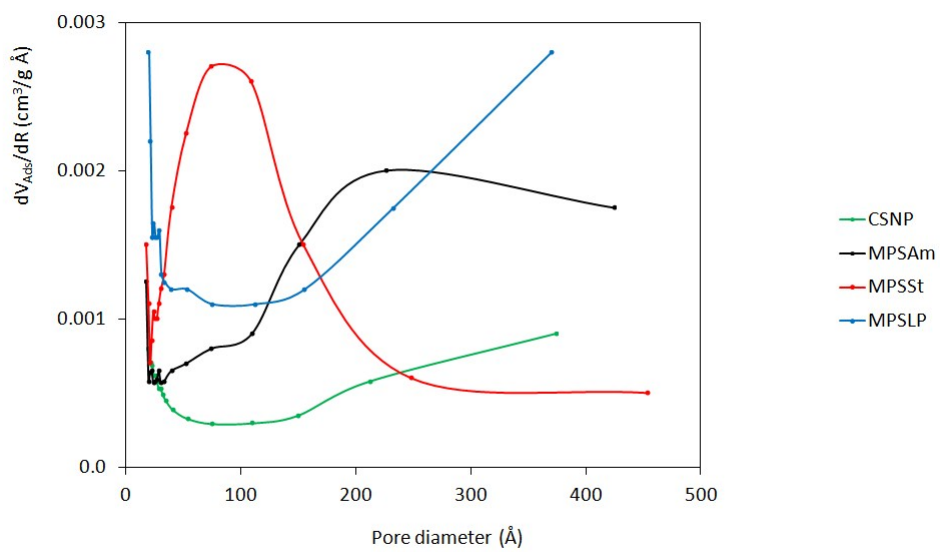

**Figure S5.** Pore size distribution calculated from nitrogen adsorption data of the indicated samples.

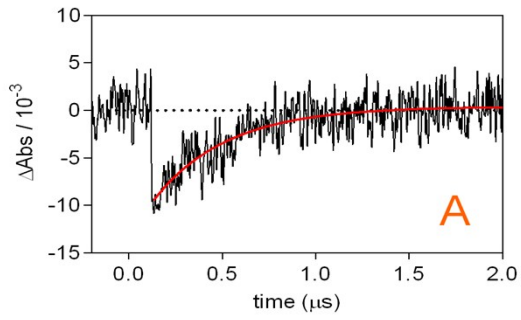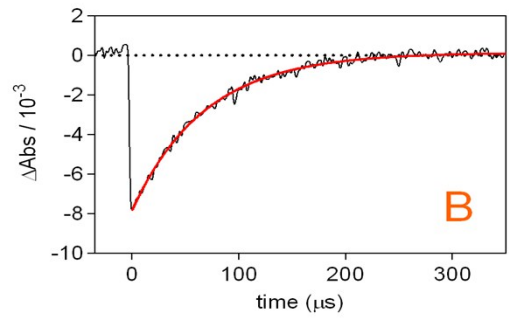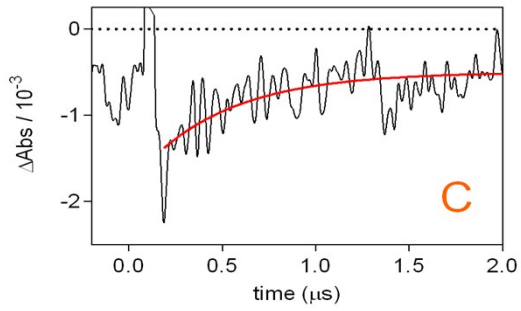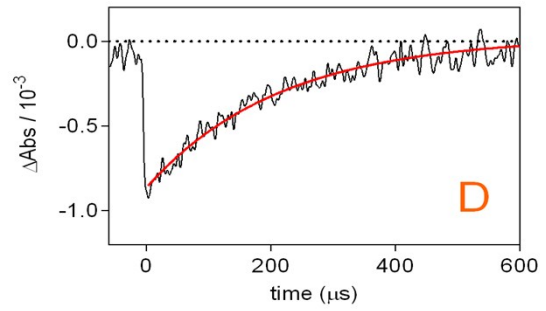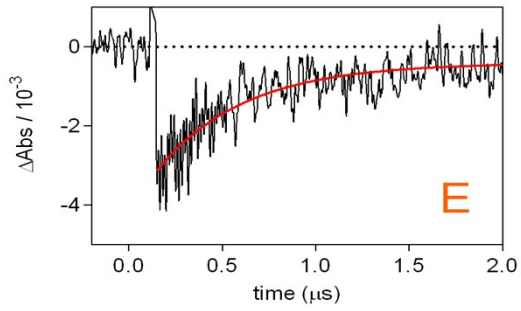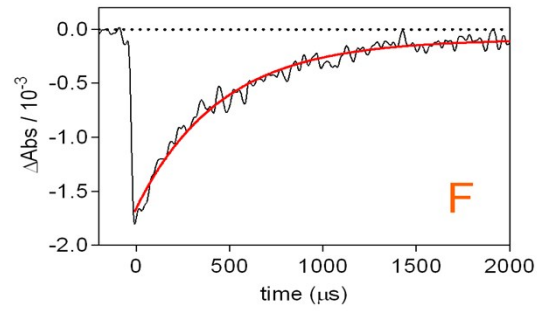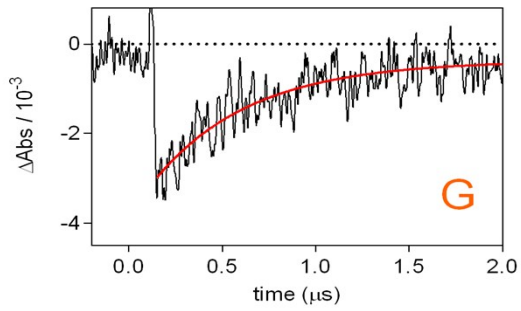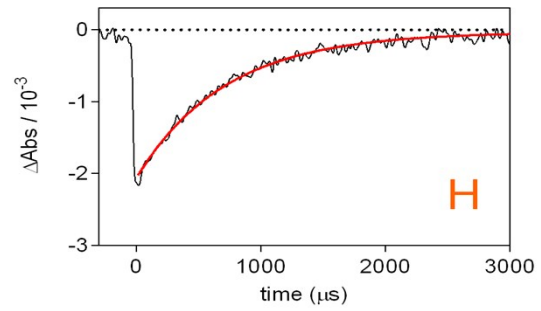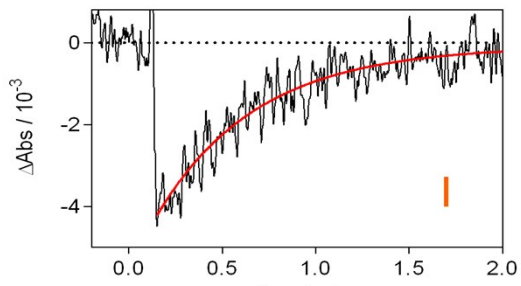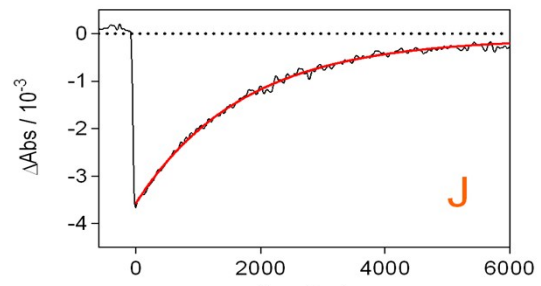

**Figure S6.** Transient absorption signals from PpIX, PpIX-CSNP, PpIX-MPSAm, PpIX-MPSSt and PpIX-MPSLP in air (A,C,E,G,I) and argon-saturated condition (B,D,F,H,J). Observation wavelength 410 nm.

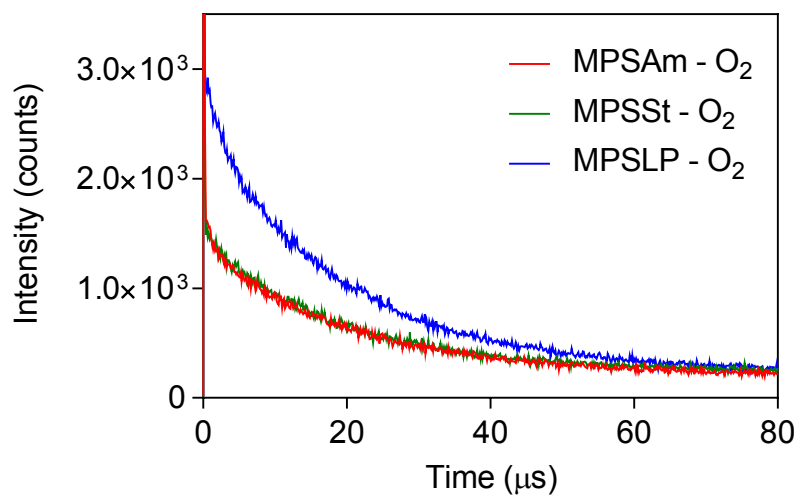

**Figure S7.** Time-resolved phosphorescence decays at 1270 nm for PpIX-MPSAm, PpIX-MPSSt, PpIX-MPSLP in DMF under oxygen saturated conditions.

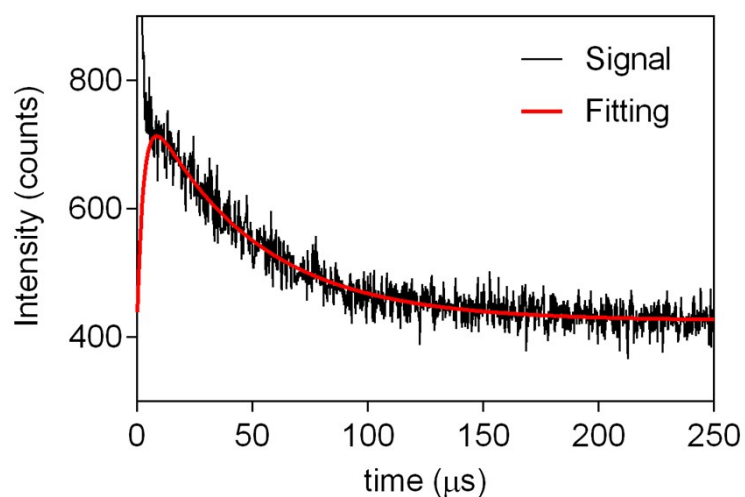

**Figure S8.** Time-resolved phosphorescence decay at 1270 nm for PpIX-MPSLP in D<sub>2</sub>O.

## Supporting tables

**Table S1.** Surface area, mesopore volume,  $\zeta$ -potential values and relative PpIX quantity per mg of silica, for silica samples.

| Sample | Surface area (m <sup>2</sup> /g) | Mesopore volume (cm <sup>3</sup> /g) | $\zeta$ -potential of SiO <sub>2</sub> -NH <sub>2</sub> (mV) | Concentration (nmol <sub>PpIX</sub> /mg <sub>Silica</sub> ) | $\zeta$ - potential of SiO <sub>2</sub> -NH <sub>2</sub> PpIX (mV) |
|--------|----------------------------------|--------------------------------------|--------------------------------------------------------------|-------------------------------------------------------------|--------------------------------------------------------------------|
| CSNP   | 102                              | 0.13                                 | 34.3 ± 0.8                                                   | 1.01 ± 0.04                                                 | 30.2 ± 0.9                                                         |
| MPSAm  | 184                              | 0.52                                 | 23.4 ± 0.6                                                   | 0.74 ± 0.03                                                 | 27.0 ± 0.2                                                         |
| MPSSt  | 228                              | 0.48                                 | 12.3 ± 0.5                                                   | 0.60 ± 0.02                                                 | 15.1 ± 0.2                                                         |
| MPSLP  | 272                              | 0.44                                 | - 0.32 ± 0.13                                                | 0.64 ± 0.02                                                 | - 5.2 ± 0.2                                                        |

The specific surface area was determined by the Brunauer, Emmett and Teller (B.E.T.) technique [S. Brunauer, P. H. Emmett and E. Teller, J. Am. Chem. Soc., 60 (1938) 309–319]; mesopore volume was calculated by the BJH method [E. P. Barrett, L. G. Joyner and P. P. Halenda, J. Am. Chem. Soc., 73 (1951) 373–380].

**Table S2.** PpIX triplet lifetimes in different systems, in air and argon-saturated environment.

| System                   | Air         | Argon       |
|--------------------------|-------------|-------------|
| PpIX <sub>solution</sub> | 0.4 $\mu$ s | 70 $\mu$ s  |
| PpIX-CSNP                | 0.3 $\mu$ s | 200 $\mu$ s |
| PpIX-MPSAm               | 0.4 $\mu$ s | 450 $\mu$ s |
| PpIX-MPSSt               | 0.4 $\mu$ s | 720 $\mu$ s |
| PpIX-MPSLP               | 0.4 $\mu$ s | 1.7 ms      |

**Table S3.** Fitting parameters obtained from the analysis of singlet oxygen phosphorescence decays sensitized by mesoporous suspensions under oxygen-saturated condition.

| Conjugate  | $S_{0,1}$ (%) | $S_{0,2}$ (%) | $\tau_{\Delta 1}$ / $\mu\text{s}$ | $\tau_{\Delta 2}$ / $\mu\text{s}$ |
|------------|---------------|---------------|-----------------------------------|-----------------------------------|
| PpIX-MPSAm | 93%           | 7%            | 21.0                              | 3.1                               |
| PpIX-MPSSt | 92.1%         | 7.9%          | 19.2                              | 1.6                               |
| PpIX-MPSLP | 82%           | 18%           | 19.8                              | 2.2                               |

**Table S4.** Silica and PpIX concentration of each system used in bacterial inactivation.

| System     | Silica concentration (mg/mL) | PpIX concentration ( $\mu\text{M}$ ) |
|------------|------------------------------|--------------------------------------|
| PpIX-CSNP  | 2                            | 2.0                                  |
| PpIX-MPSAm | 2                            | 1.5                                  |
| PpIX-MPSSt | 2                            | 1.2                                  |
| PpIX-MPSLP | 2                            | 1.3                                  |
